# Supplementary material
Source: publisher figshare collection journal article supplement (https://frontiersin.figshare.com/ndownloader/files/21934620)
Supplement: Supplementary file [file 21934620]

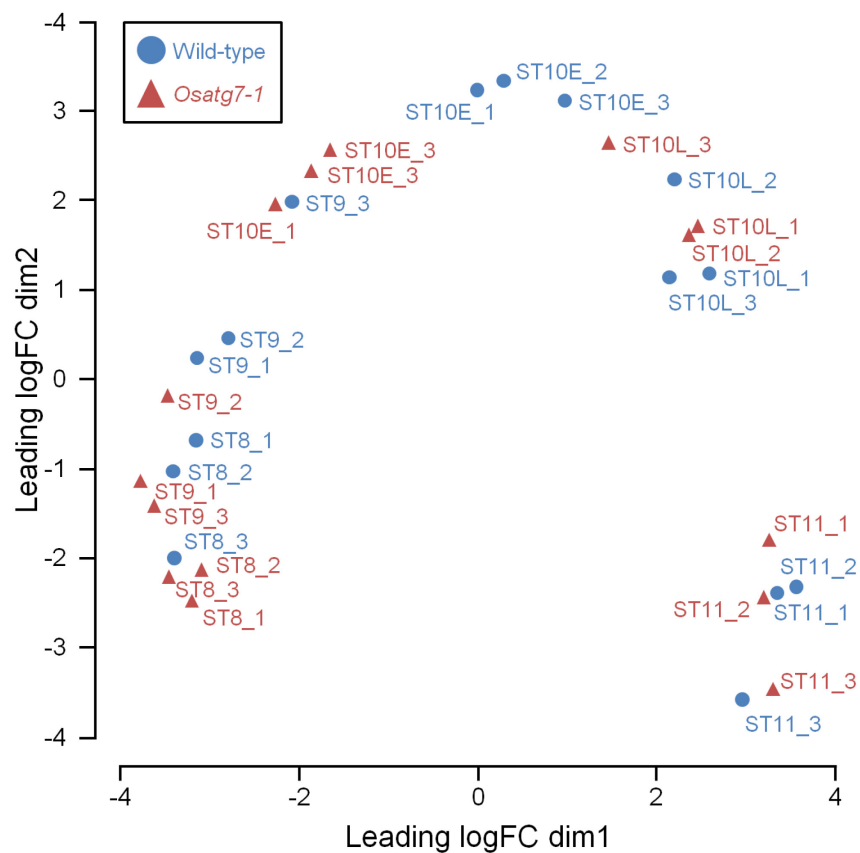

**Supplementary Figure 1. MDS plot analyses.** MDS was performed via calculating log-fold changes between wild-type and using ASDs to compute distances in EdgeR with the “plotMDS” function.

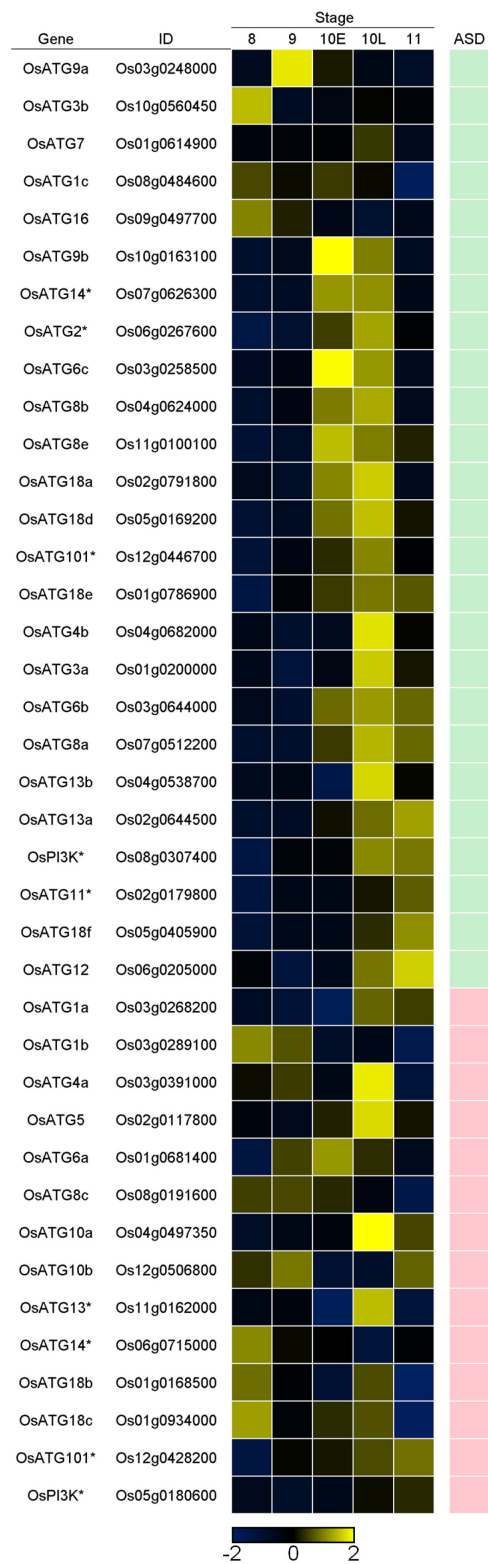

**Supplementary Figure 2. Expression profiles of all ATG genes of rice anthers during pollen development.** The heatmap shows in scaled expression patterns of ATG genes of rice during anther developmental stages in wild-type anthers. Green and Pink boxes indicate ASD (FDR < 0.01) or not (FDR > 0.01), respectively.

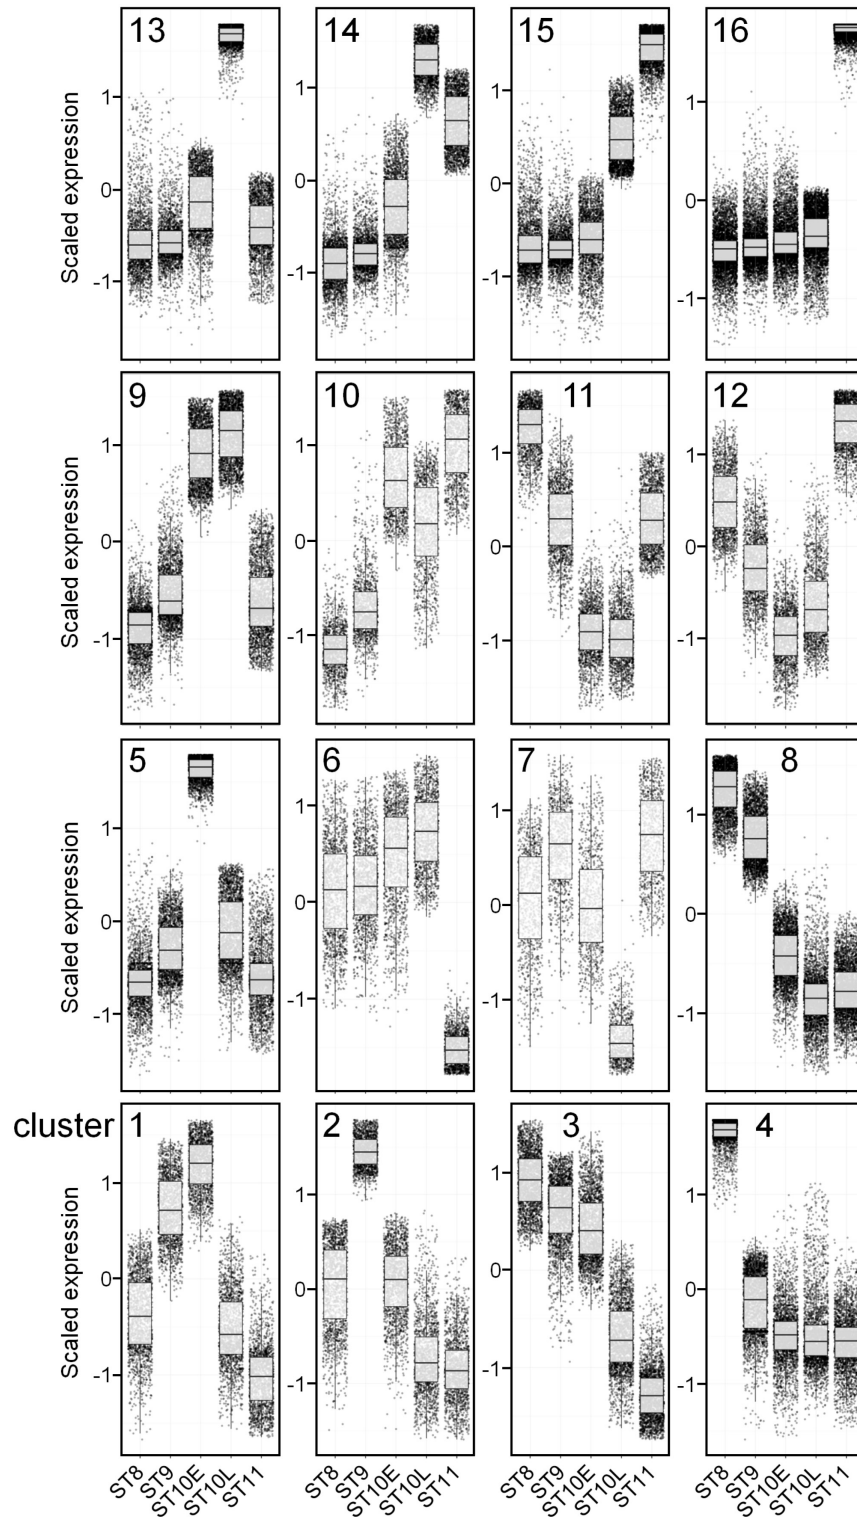

**Supplementary Figure 3. Box plots showing expression patterns of each cluster.** Scaled expression between the wild-type and *Osatg7-1* mutant plotted during 10 different conditions (wild-type and *Osatg7-1*, 5 developmental stages) is shown. Box plot explanation: upper horizontal line of box, 75th percentile; lower horizontal line of box, 25th percentile; horizontal bar within box, median; upper horizontal bar outside box, 90th percentile; lower horizontal bar outside box, 10th percentile.

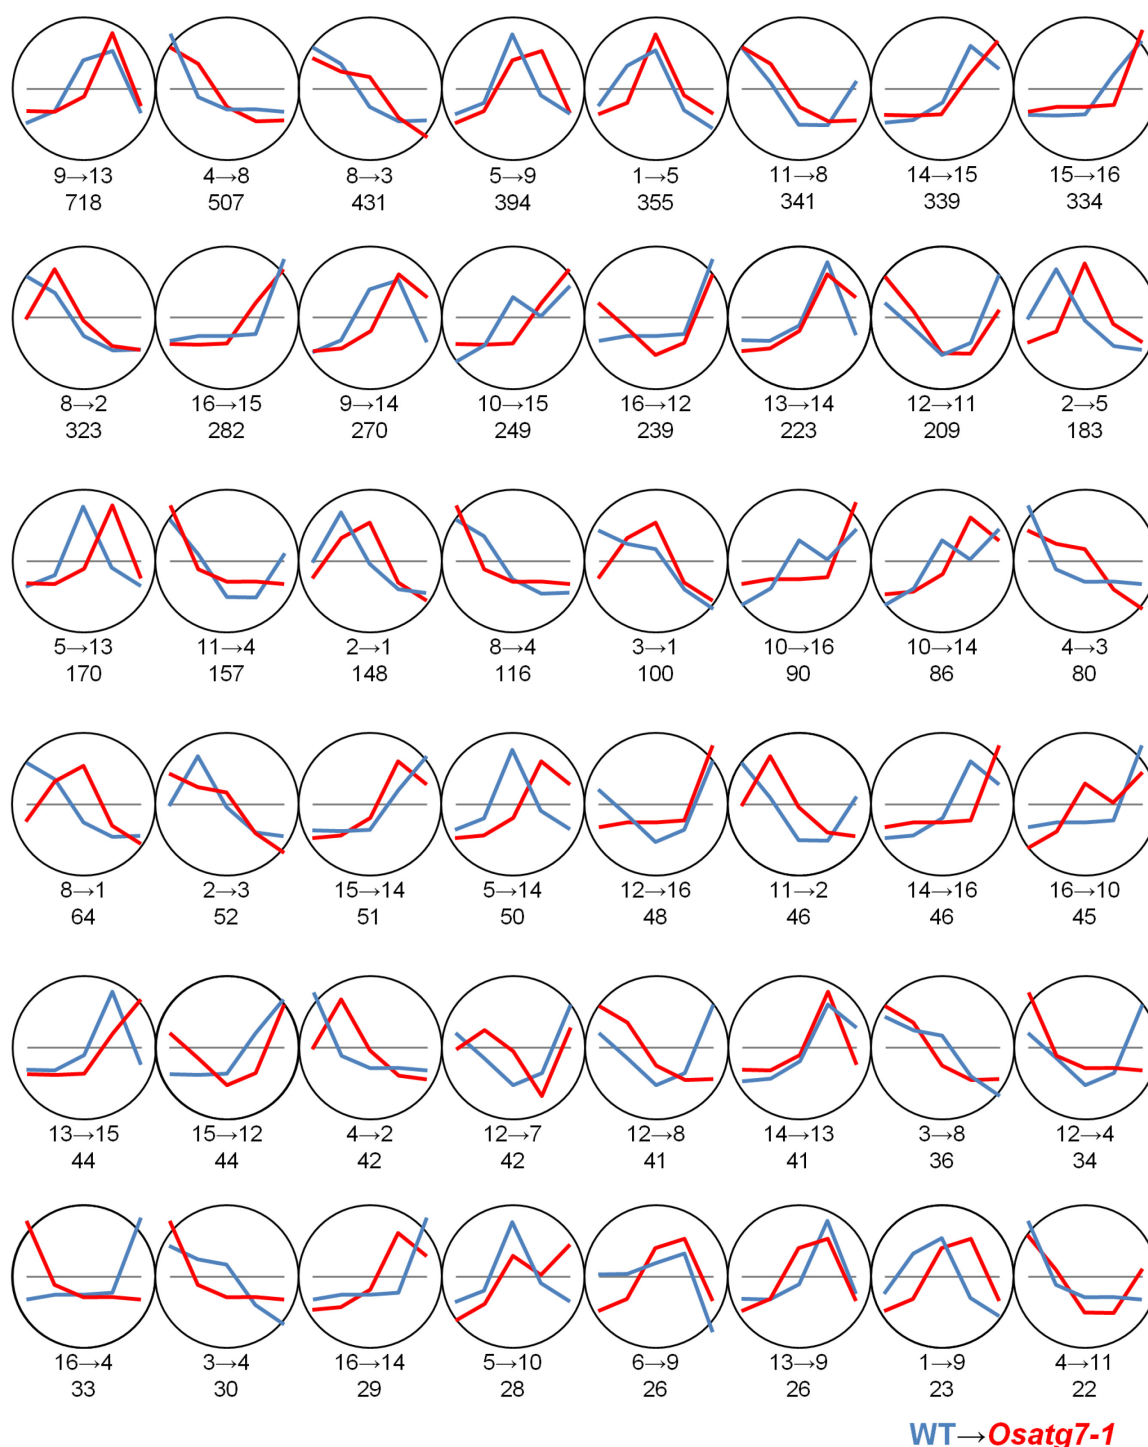

**Supplementary Figure 4. Displacement directions after SOM clustering of data that were scaled separately from wild-type to *Osatg7-1*.** Line plots indicate representative expression patterns in each cluster.

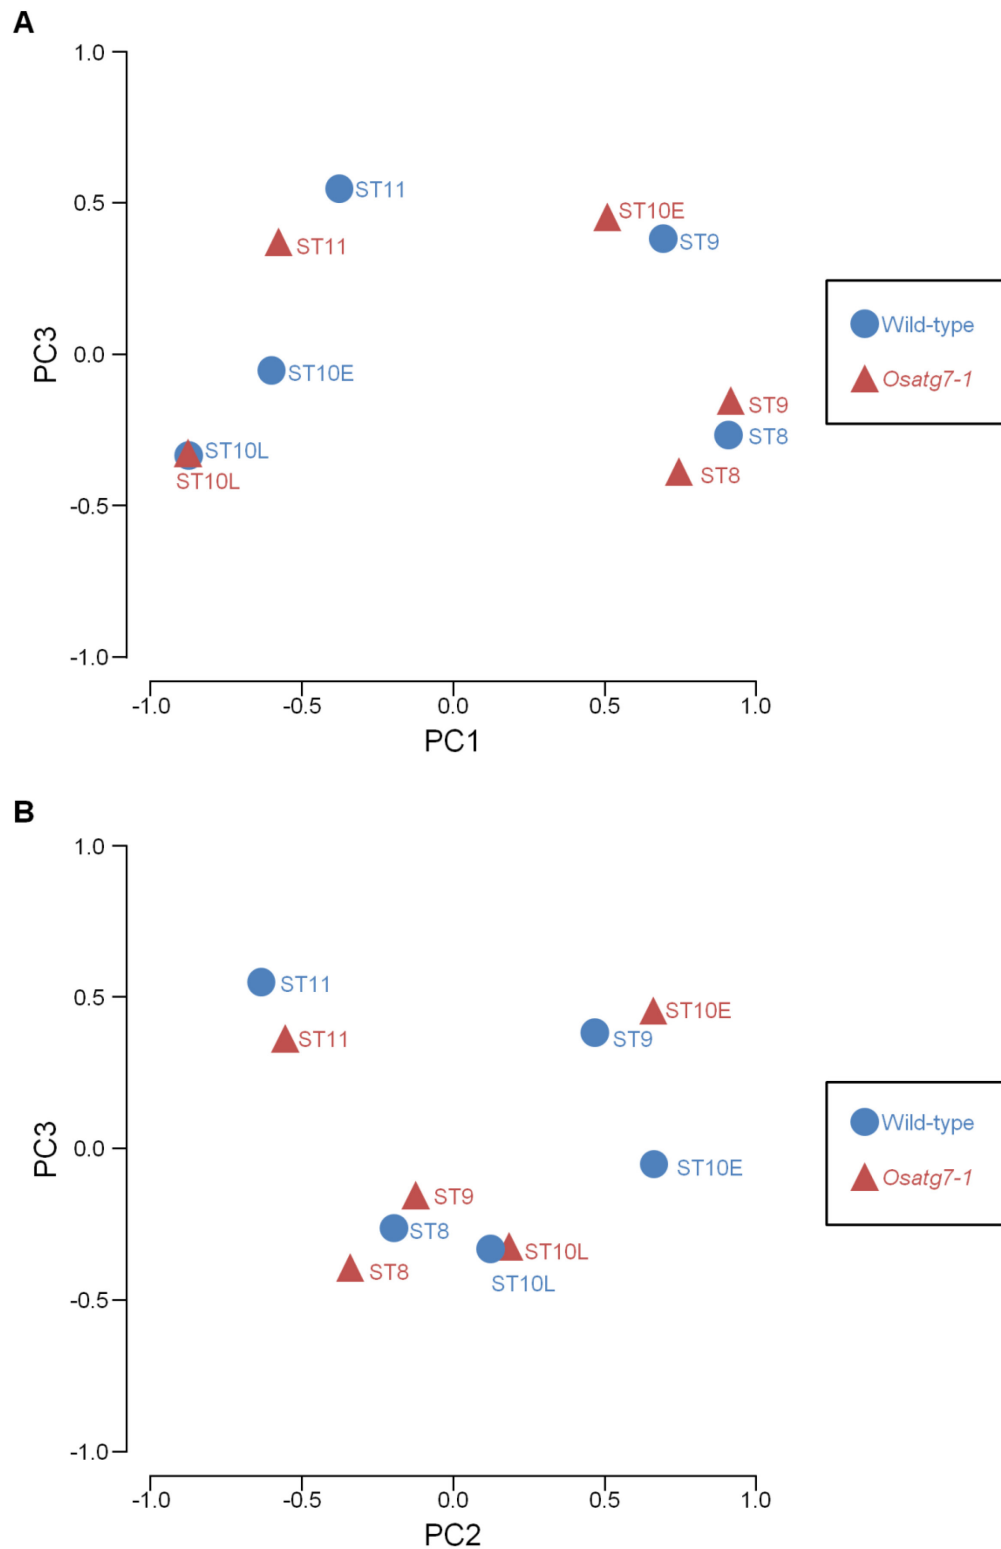

**Supplementary Figure 5. PCA of gene expression.** The global expression profile of each transcript is represented as PC1 and PC3 (A) and PC2 and PC3 (B). Note distinct dissimilarities between the wild-type and *Osatg7-1* mutant at ST9 and ST10E.

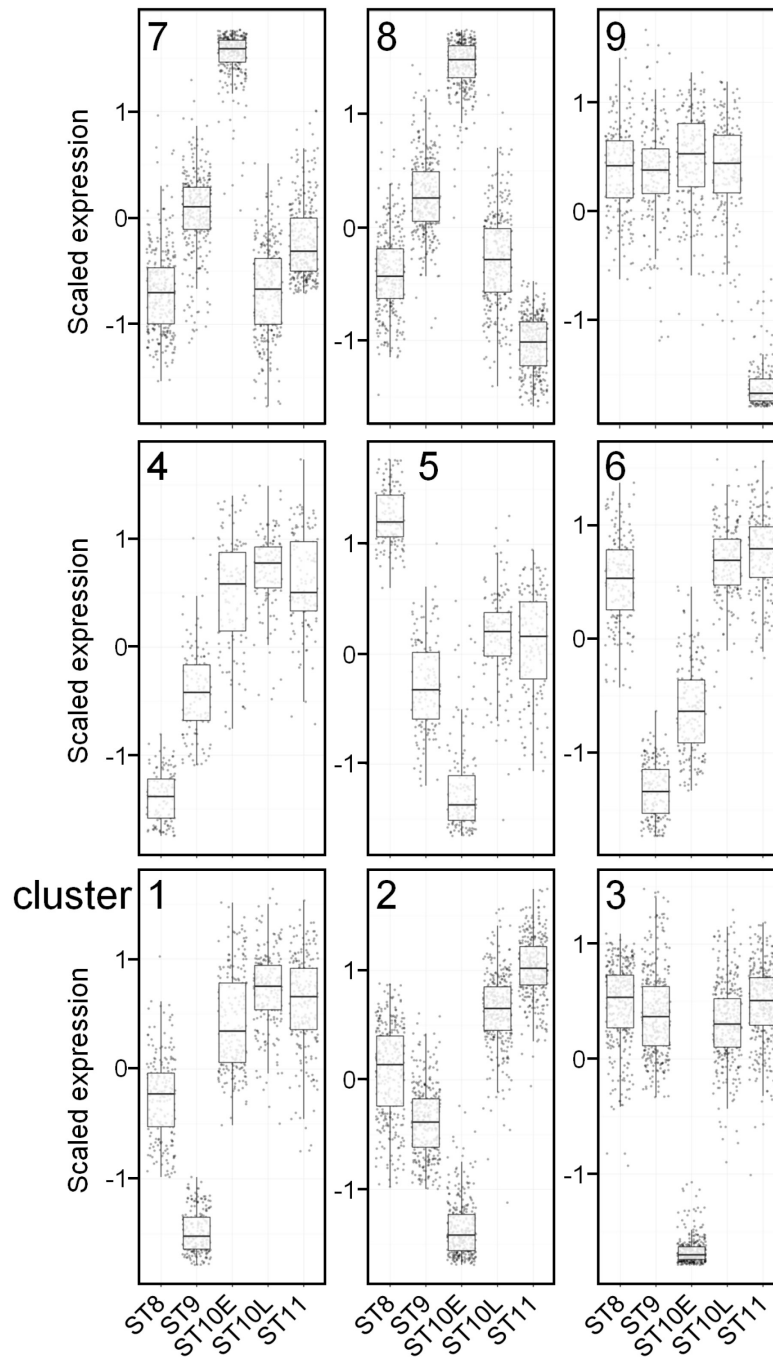

**Supplementary Figure 6. Box plots showing expression patterns of each cluster.** Scaled expression patterns between the wild-type and *Osatg7-1* mutant plotted at ST8, ST9, ST10E, ST10L, and ST11 are shown. Box plot explanation: upper horizontal line of box, 75th percentile; lower horizontal line of box, 25th percentile; horizontal bar within box, median; upper horizontal bar outside box, 90th percentile; lower horizontal bar outside box, 10th percentile.

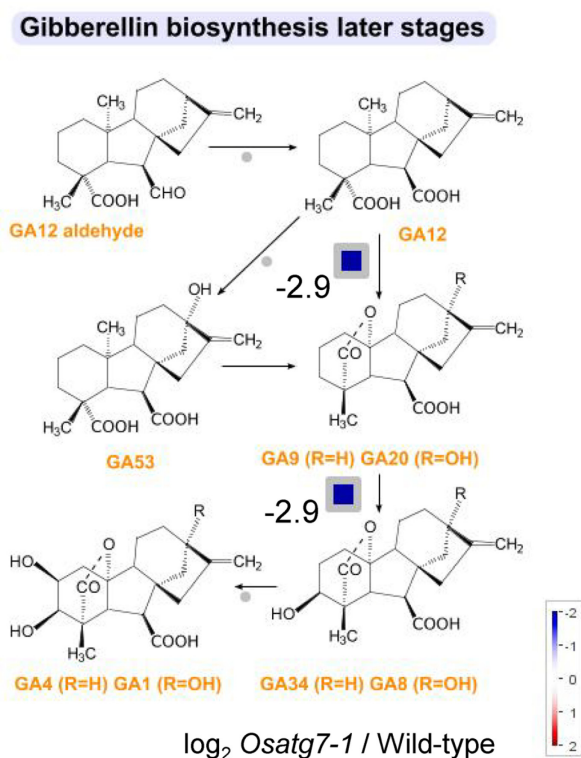

**Supplementary Figure 7. Overview diagram of associated with ADDs at stage 10E in GA-biosynthesis later stages by MapMan analysis.** The color key represents normalized log<sub>2</sub> values. Red represents up-regulation and blue represents down-regulation between the wild-type and *Osatg7-1* mutant.

**Supplemental Table S1. Primers used in this qPCR experiment.**

| Gene name | Accession No. | Primer sequence                                         | Size (bp) |
|-----------|---------------|---------------------------------------------------------|-----------|
| TIP2      | Os01g0293100  | F: GGCGACTGCCACATCTACA<br>R: ATCGGTCGGTCGGCTAA          | 140       |
| EAT1      | Os04g0599300  | F: GAAGAAGGCCAACTCTCTGCT<br>R: GCATAAACC GCCGAACCT      | 144       |
| GAMyb     | Os01g0812000  | F: ACTGAATCCACCCCTCCTGT<br>R: GCCCCATTACTTGCTCTCCA      | 109       |
| AP38      | Os04g0596200  | F: ATGCCGATGCTGGTGGGA<br>R: GTAGAGGCTTGGATGCGTGAG       | 132       |
| AP25      | Os03g0186900  | F: GAACATCCGGGTCGTCTTC<br>R: AAGCCGTTCTCGTGCATTT        | 150       |
| CYP704B2  | Os03g0168600  | F: GTTGAGATCGGGACGCTGT<br>R: CTCGATGAACCGCGACAGTA       | 279       |
| MYB80     | Os04g0470600  | F: GAATAGTTTTACCGAGAAGCACTGA<br>R: CGACTGAAGCAGAGGACTGG | 82        |
| C4        | Os08g0546300  | F: CATGAACAGCCTGCCTTCC<br>R: CAGCAACCGGGCATTACA         | 233       |
| UBQ5      | Os01g0328400  | F: ACCACTTCGACCGCCACTACT<br>R: ACGCCTAAGCCTGCTGGTT      | 69        |
